# Supplementary material for: Online and Offline Behavior Change Techniques to Promote a Healthy Lifestyle: A Qualitative Study
Source: Int J Environ Res Public Health. 2022 Jan 4;19(1):521. doi: 10.3390/ijerph19010521 (PMC8744993; doi:10.3390/ijerph19010521)
Supplement: Supplementary file 1 [file ijerph-19-00521-s001.zip › File S3_Analysis.pdf]

## File S3: Analysis

| Code System                                              | 1523 |
|----------------------------------------------------------|------|
| > Geslacht                                               | 3    |
| > Leeftijd                                               | 14   |
| > Opleiding                                              | 6    |
| > Jaren werkervaring in leefstijlcoaching                | 60   |
| > (neven) Werkzaamheden                                  | 4    |
| > Doelgroep                                              | 48   |
| > Soort GLI                                              | 33   |
| > Werkwijze rondom BCT's                                 | 170  |
| > Effect van gedragsveranderingstechnieken               | 39   |
| > Semi-gedragsveranderingstechnieken die worden gebruikt | 26   |
| > BCT technieken die worden gebruikt                     | 403  |
| > BCT's die niet of weinig worden gebruikt               | 65   |
| > Een grote ordner werkt niet, iets leuks, kleins wel    | 2    |
| > GLI online uitvoeren                                   | 152  |
| > Groepsbijeenkomsten                                    | 9    |
| > leefstijlzorg voor GLI                                 | 8    |
| > Verkeerde verwachtingen                                | 6    |
| > Psychologische zorg tijdens de GLI                     | 20   |
| > Wensen voor nieuwe idee binnen project                 | 6    |
| > Uitval                                                 | 2    |
| • BLUE                                                   | 169  |
| • GREEN                                                  | 1    |
| • MAGENTA                                                | 130  |
| • RED                                                    | 104  |
| • YELLOW                                                 | 43   |

N=14, conducted by K.B

|                                                                                                                                 |            |
|---------------------------------------------------------------------------------------------------------------------------------|------------|
| ▼ ● 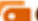 <b>Code System</b>                        |            |
| > ● 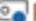 Persoonlijke gegevens                     | <b>681</b> |
| > ● 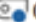 Coachingstraject                          | 125        |
| > ● 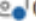 Gedragsveranderingstechnieken             | 56         |
| > ● 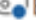 Ervaringen met digitale coachingsmiddelen | 206        |
| > ● 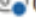 Gebruik digitale coachingsmiddelen        | 156        |
| > ● 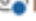 Personaliseren                            | 75         |
| > ● 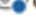 Overig                                    | 48         |
| ● 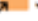 <b>Sets</b>                                 | 15         |
|                                                                                                                                 | <b>0</b>   |

N=14, conducted by M.B

|                                                                                                                                |            |
|--------------------------------------------------------------------------------------------------------------------------------|------------|
| ▼ ● 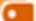 <b>Code System</b>                       | <b>448</b> |
| ● 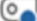 Geen uitzonderingen (no special situation) | 1          |
| > ● 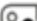 1) Verhouding online vs. offline         | 38         |
| > ● 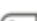 2) Gebruik in de praktijk                | 162        |
| > ● 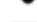 3) Stimuleren van gebruik e-coaching     | 35         |
| > ● 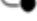 4) Beïnvloeden gedrag                    | 85         |
| > ● 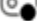 5) Kenmerken interventie               | 87         |
| > ● 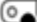 6) Persoonlijke gegevens               | 40         |
| ● 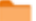 <b>Sets</b>                              | <b>0</b>   |

N=10, conducted by D.B and M.W
